# Supplementary material for: SmartStartAllergy: a novel tool for monitoring food allergen introduction in infants
Source: PubMed Central journal article supplement — Med J Aust. 2020 Jan 25;212(6):271–5. doi: 10.5694/mja2.50484 (PMC7187408; doi:10.5694/mja2.50484), 2020-01-25
Supplement: MJA2-212-271-s001.pdf [file MJA2-212-271-s001.pdf]

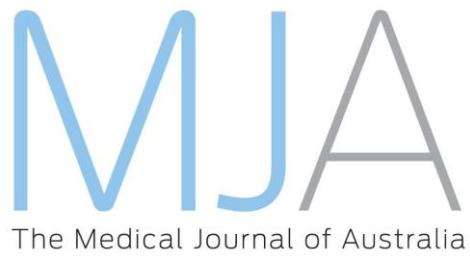

## **Supporting Information**

### **Supplementary figures**

**This appendix was part of the submitted manuscript and has been peer reviewed.  
It is posted as supplied by the authors.**

Appendix to: O'Sullivan M,\* Vale S,\* Loh RKS, et al. SmartStartAllergy: a novel tool for monitoring food allergen introduction in infants. *Med J Aust* 2020; doi: 10.5694/mja2.50484.

\* Equal first authors.

Figure 1 (next page). Questions from the online questionnaire on food introduction and allergic reactions

**SmartStart Survey**  
*Food Allergy Prevention*

**Which of the following foods has your child eaten?**

Dairy

Yes  No

Egg

Yes  No

Fish

Yes  No

Peanut

Yes  No

Sesame

Yes  No

Soy

Yes  No

TreeNut

Yes  No

Wheat

Yes  No

**NEXT**

**SmartStart Survey**  
*Food Allergy Prevention*

**Which food(s) have caused an allergic reaction (tick all that apply)?**

Dairy

Yes  No

Egg

Yes  No

Fish

Yes  No

Wheat

Yes  No

Other

Yes  No

**NEXT**

**SmartStart Survey**  
*Food Allergy Prevention*

**Did your child have any of the following symptoms to Egg? (Tick all that apply)**

Rash around the mouth

Yes  No

Swelling of lips, face, eyes

Yes  No

Hives or welts on face or body

Yes  No

Tummy pain and/or vomiting

Yes  No

Difficulty breathing

Yes  No

Swelling of tongue

Yes  No

Went pale or floppy

Yes  No

**NEXT**

**How soon AFTER eating the food did the symptoms FIRST appear?**

<5 minutes

5-30 minutes

30 minutes – 2 hours

2-4 hours

>4 hours

**NEXT**

**Were any of these treatments given for the allergic reaction?**

Oral antihistamine

Yes  No

Adrenaline (EpiPen)

Yes  No

Other (please tell us)

Yes  No

**NEXT**

**Has your child EVER had dry, red, itchy, scaly skin (eczema)?**

Yes  No

**NEXT**

**Has your child's mum, dad or siblings EVER had eczema, asthma, food allergy or hay fever?**

Mum

Yes  No

Dad

Yes  No

Sibling

Yes  No

**NEXT**

**Has the child's Dad ever had...**

Asthma

Yes  No

Eczema

Yes  No

Hay fever

Yes  No

Food allergy

Yes  No

**NEXT**

**Was your child or either parent born overseas?**

Yes  No

**NEXT**

**Which family members were born overseas (tick all that apply)?**

Mother

Yes  No

Father

Yes  No

Child

Yes  No

**NEXT**

**Where was the Mother born?**

East/Southeast Asia

South Asia (Indian subcontinent)

Central Asia / Middle East

Africa

North America

South America

Oceania

Europe

**NEXT**

**SmartStart Survey**  
*Food Allergy Prevention*

Thank you for taking the time to complete this survey and help us learn more about preventing food allergies.

SmartStart Survey

**Figure 2. Flow of participants through the study, including SMS and questionnaire response rates**

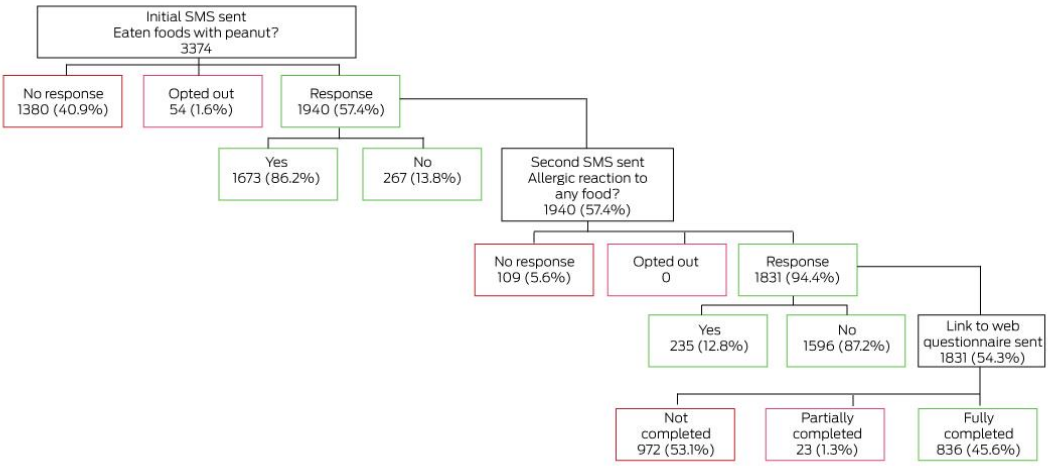

**Figure 3. Parent-reported food-related reactions, by food type and whether professional medical assistance was sought at the time of the reaction\***

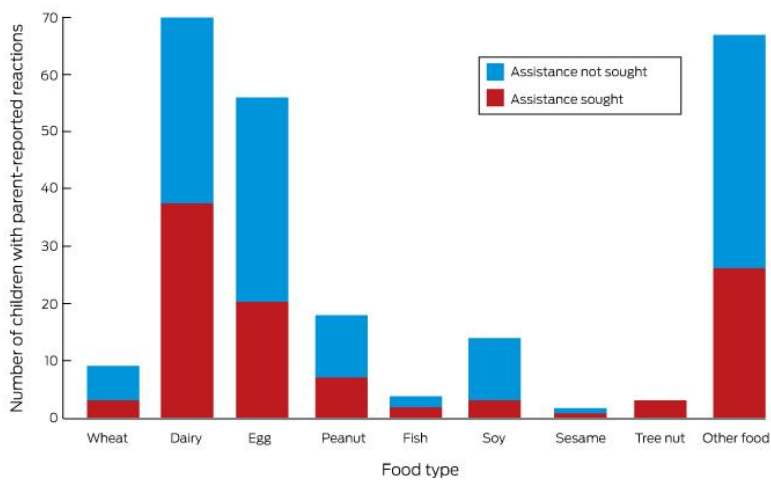

\* Total number of reactions: 250; data missing (no response): dairy, two; peanut, two; other food, three.
